# Supplementary material for: Analysis of a nanoparticle-enriched fraction of plasma reveals miRNA candidates for Down syndrome pathogenesis
Source: PubMed Central journal article supplement — Int J Mol Med. 2019 Apr 9;43(6):2303–18. doi: 10.3892/ijmm.2019.4158 (PMC6488180; doi:10.3892/ijmm.2019.4158), 2019-04-09
Supplement: IJMM-43-06-2303-supp.pdf [file IJMM-43-06-2303-supp.pdf]

Table SI. Clinical characteristics of the DS subjects recruited.

| Variables                          | Yes   | No    | Missing |
|------------------------------------|-------|-------|---------|
| HEAD at examination                |       |       |         |
| Hypotonia                          | 10    | 1     | 4       |
| %                                  | 66.67 | 6.67  | 26.67   |
| Brachycephaly                      | 11    | 3     | 1       |
| %                                  | 73.33 | 20.00 | 6.67    |
| Flat occipit                       | 12    | 3     | 0       |
| %                                  | 80.00 | 20.00 | 0.00    |
| Flat facial profile                | 11    | 4     | 0       |
| %                                  | 73.33 | 26.67 | 0.00    |
| Flattened nose                     | 11    | 4     | 0       |
| %                                  | 73.33 | 26.67 | 0.00    |
| Small ears                         | 7     | 6     | 2       |
| %                                  | 46.67 | 40.00 | 13.33   |
| Folded helix                       | 6     | 6     | 3       |
| %                                  | 40.00 | 40.00 | 20.00   |
| Hearing loss                       | 2     | 11    | 2       |
| %                                  | 13.33 | 73.33 | 13.33   |
| Mouth permanently open             | 8     | 7     | 0       |
| %                                  | 53.33 | 46.67 | 0.00    |
| Protruding tongue                  | 7     | 8     | 0       |
| %                                  | 46.67 | 53.33 | 0.00    |
| Furrowed tongue                    | 11    | 4     | 0       |
| %                                  | 73.33 | 26.67 | 0.00    |
| High arched palate                 | 12    | 2     | 1       |
| %                                  | 80.00 | 13.33 | 6.67    |
| Small teeth                        | 7     | 6     | 2       |
| %                                  | 46.67 | 40.00 | 13.33   |
| Narrow palade                      | 13    | 1     | 1       |
| %                                  | 86.67 | 6.67  | 6.67    |
| Conical teeth                      | 5     | 6     | 4       |
| %                                  | 33.33 | 40.00 | 26.67   |
| Upslanting palpebral fissures      | 14    | 1     | 0       |
| %                                  | 93.33 | 6.67  | 0.00    |
| Epicanthus                         | 11    | 1     | 3       |
| %                                  | 73.33 | 6.67  | 20.00   |
| Nystagmus                          | 2     | 13    | 0       |
| %                                  | 13.33 | 86.67 | 0.00    |
| Strabismus                         | 3     | 10    | 2       |
| %                                  | 20.00 | 66.67 | 13.33   |
| Congenital heart defect            | 9     | 5     | 1       |
| %                                  | 60.00 | 33.33 | 6.67    |
| Murmur                             | 7     | 6     | 2       |
| %                                  | 46.67 | 40.00 | 13.33   |
| Heart surgery                      | 5     | 8     | 2       |
| %                                  | 33.33 | 53.33 | 13.33   |
| Separation of the abdominal muscle | 4     | 10    | 1       |
| %                                  | 26.67 | 66.67 | 6.67    |
| Umbilical hernia                   | 3     | 11    | 1       |
| %                                  | 20.00 | 73.33 | 6.67    |
| Short neck                         | 9     | 6     | 0       |
| %                                  | 60.00 | 40.00 | 0.00    |
| Joint laxity                       | 13    | 2     | 0       |
| %                                  | 86.67 | 13.33 | 0.00    |
| Short and broad hands              | 10    | 4     | 1       |
| %                                  | 66.67 | 26.67 | 6.67    |

Table SI. Continued.

| Variables                           | Yes   | No    | Missing |
|-------------------------------------|-------|-------|---------|
| Fifth Finger Mid-Phalanx Hypoplasia | 9     | 5     | 1       |
| %                                   | 60.00 | 33.33 | 6.67    |
| 5th incurved finger                 | 8     | 7     | 0       |
| %                                   | 53.33 | 46.67 | 0.00    |
| Single transverse palmar crease     | 6     | 9     | 0       |
| %                                   | 40.00 | 60.00 | 0.00    |
| Hallux separated                    | 11    | 4     | 0       |
| %                                   | 73.33 | 26.67 | 0.00    |
| Mental retardation                  | 12    | 0     | 3       |
| %                                   | 80.00 | 0.00  | 20.00   |
| Celiac disease                      | 2     | 13    | 0       |
| %                                   | 13.33 | 86.67 | 0.00    |
| Masticatory dysfunction             | 4     | 10    | 1       |
| %                                   | 26.67 | 66.67 | 6.67    |
| Constipation                        | 5     | 10    | 0       |
| %                                   | 33.33 | 66.67 | 0.00    |
| Diarrhea                            | 2     | 13    | 0       |
| %                                   | 13.33 | 86.67 | 0.00    |
| Small genitalia                     | 2     | 10    | 3       |
| %                                   | 13.33 | 66.67 | 20      |

Table SII. Non-parametric Wilcoxon signed-rank test (or Kruskal Wallis test<sup>a</sup>-when the subgroups are more than two) between miR expression levels and DS pathologies.

| DS pathologies                       | miR-16-5p | P-values | miR-144-3p | P-values | miR-99b-5p | P-values |
|--------------------------------------|-----------|----------|------------|----------|------------|----------|
| <b>Ipotonia</b>                      |           |          |            |          |            |          |
| <i>No</i>                            | 2.20      |          | 4.51       |          | 2.98       |          |
| <i>Yes</i>                           | 3.30      | 0.5455   | 5.27       | 0.9091   | 4.36       | 0.7273   |
| <b>Brachycephaly</b>                 |           |          |            |          |            |          |
| <i>No</i>                            | 2.28      |          | 4.45       |          | 4.18       |          |
| <i>Yes</i>                           | 3.77      | 0.5549   | 5.47       | 0.5549   | 4.53       | 0.5549   |
| <b>Flat occipit</b>                  |           |          |            |          |            |          |
| <i>No</i>                            | 2.28      |          | 4.45       |          | 4.18       |          |
| <i>Yes</i>                           | 3.52      | 0.7341   | 5.38       | 0.3648   | 3.89       | 1.0000   |
| <b>Flat facial profile</b>           |           |          |            |          |            |          |
| <i>No</i>                            | 3.91      |          | 5.27       |          | 4.70       |          |
| <i>Yes</i>                           | 3.27      | 0.9495   | 5.29       | 0.8513   | 3.24       | 0.8513   |
| <b>Flattened nose</b>                |           |          |            |          |            |          |
| <i>No</i>                            | 4.18      |          | 5.28       |          | 4.70       |          |
| <i>Yes</i>                           | 3.27      | 0.4117   | 5.29       | 0.8513   | 3.24       | 0.9495   |
| <b>Small ears</b>                    |           |          |            |          |            |          |
| <i>No</i>                            | 2.99      |          | 4.79       |          | 2.97       |          |
| <i>Yes</i>                           | 2.82      | 0.7308   | 5.29       | 0.7308   | 4.18       | 0.5338   |
| <b>Folded helix</b>                  |           |          |            |          |            |          |
| <i>No</i>                            | 3.05      |          | 4.78       |          | 3.57       |          |
| <i>Yes</i>                           | 3.56      | 0.6991   | 5.78       | 0.1797   | 4.23       | 0.3095   |
| <b>Hearing loss</b>                  |           |          |            |          |            |          |
| <i>No</i>                            | 2.30      |          | 5.07       |          | 3.24       |          |
| <i>Yes</i>                           | 3.05      | 0.9231   | 4.89       | 0.9231   | 4.18       | 0.9231   |
| <b>Mouth permanently open</b>        |           |          |            |          |            |          |
| <i>No</i>                            | 3.77      |          | 5.47       |          | 5.22       |          |
| <i>Yes</i>                           | 2.55      | 0.2810   | 4.50       | 0.5358   | 2.97       | 0.3357   |
| <b>Protruding tongue</b>             |           |          |            |          |            |          |
| <i>No</i>                            | 4.30      |          | 5.78       |          | 4.88       |          |
| <i>Yes</i>                           | 2.82      | 0.4634   | 4.51       | 0.5358   | 2.98       | 0.5358   |
| <b>Furrowed tongue</b>               |           |          |            |          |            |          |
| <i>No</i>                            | 3.73      |          | 5.15       |          | 4.62       |          |
| <i>Yes</i>                           | 3.27      | 0.9495   | 5.29       | 0.8513   | 4.18       | 0.9495   |
| <b>High arched palate</b>            |           |          |            |          |            |          |
| <i>No</i>                            | 2.66      |          | 4.44       |          | 4.29       |          |
| <i>Yes</i>                           | 3.83      | 0.3516   | 5.52       | 0.2637   | 4.36       | 0.7912   |
| <b>Small teeth</b>                   |           |          |            |          |            |          |
| <i>No</i>                            | 3.30      |          | 4.79       |          | 3.76       |          |
| <i>Yes</i>                           | 3.27      | 0.9452   | 5.29       | 0.8357   | 4.18       | 0.7308   |
| <b>Narrow palate</b>                 |           |          |            |          |            |          |
| <i>No</i>                            | 3.27      |          | 5.29       |          | 5.99       |          |
| <i>Yes</i>                           | 3.77      | 1.0000   | 5.47       | 1.0000   | 4.18       | 0.5714   |
| <b>Conical teeth</b>                 |           |          |            |          |            |          |
| <i>No</i>                            | 4.30      |          | 5.58       |          | 4.88       |          |
| <i>Yes</i>                           | 3.27      | 0.5368   | 5.29       | 0.6623   | 2.98       | 0.9307   |
| <b>Upslanting palpebral fissures</b> |           |          |            |          |            |          |
| <i>No</i>                            | 7.68      |          | 6.71       |          | 7.89       |          |
| <i>Yes</i>                           | 3.05      | 0.1333   | 5.18       | 0.5333   | 3.71       | 0.1333   |
| <b>Epicanthus</b>                    |           |          |            |          |            |          |
| <i>No</i>                            | 3.77      |          | 5.07       |          | 4.53       |          |
| <i>Yes</i>                           | 3.89      | 1.0000   | 5.57       | 1.0000   | 4.18       | 1.0000   |
| <b>Nystagmus</b>                     |           |          |            |          |            |          |
| <i>No</i>                            | 3.77      |          | 5.47       |          | 4.53       |          |
| <i>Yes</i>                           | 2.08      | 0.3048   | 4.20       | 0.2286   | 2.52       | 0.1143   |

Table SII. Continued.

| DS pathologies                            | miR-16-5p | P-values | miR-144-3p | P-values | miR-99b-5p | P-values |
|-------------------------------------------|-----------|----------|------------|----------|------------|----------|
| <i>Strabismus</i>                         |           |          |            |          |            |          |
| No                                        | 2.56      |          | 4.79       |          | 2.97       |          |
| Yes                                       | 3.27      | 0.5734   | 5.29       | 0.5734   | 5.40       | 0.1119   |
| <i>Congenital heart defect</i>            |           |          |            |          |            |          |
| No                                        | 3.77      |          | 5.07       |          | 4.53       |          |
| Yes                                       | 2.30      | 0.5185   | 5.29       | 1.0000   | 4.18       | 0.8981   |
| <i>Murmur</i>                             |           |          |            |          |            |          |
| No                                        | 3.30      |          | 4.79       |          | 3.76       |          |
| Yes                                       | 3.27      | 0.9452   | 5.47       | 0.6282   | 5.22       | 0.9452   |
| <i>Heart surgery</i>                      |           |          |            |          |            |          |
| No                                        | 4.30      |          | 5.89       |          | 4.97       |          |
| Yes                                       | 2.30      | 0.2222   | 5.29       | 0.3543   | 3.24       | 0.4351   |
| <i>Separation of the abdominal muscle</i> |           |          |            |          |            |          |
| No                                        | 3.10      |          | 5.52       |          | 3.11       |          |
| Yes                                       | 3.52      | 0.7333   | 5.18       | 1.0000   | 4.97       | 0.4535   |
| <i>Umbilical hernia</i>                   |           |          |            |          |            |          |
| No                                        | 2.30      |          | 5.47       |          | 3.24       |          |
| Yes                                       | 3.77      | 0.5549   | 5.29       | 1.0000   | 5.22       | 0.4560   |
| <i>Short neck</i>                         |           |          |            |          |            |          |
| No                                        | 4.35      |          | 6.00       |          | 5.70       |          |
| Yes                                       | 2.82      | 0.4559   | 5.07       | 0.5287   | 2.98       | 0.1447   |
| <i>Joint laxity</i>                       |           |          |            |          |            |          |
| No                                        | 4.01      |          | 3.36       |          | 3.95       |          |
| Yes                                       | 3.27      | 1.0000   | 5.29       | 0.6857   | 4.18       | 1.0000   |
| <i>Short and broad hands</i>              |           |          |            |          |            |          |
| No                                        | 1.81      |          | 4.19       |          | 3.43       |          |
| Yes                                       | 3.83      | 0.1878   | 5.52       | 0.1419   | 4.88       | 0.2398   |
| <i>5th short</i>                          |           |          |            |          |            |          |
| No                                        | 2.82      |          | 4.48       |          | 4.18       |          |
| Yes                                       | 3.27      | 0.8981   | 5.29       | 1.0000   | 3.24       | 0.7972   |
| <i>5th incurved</i>                       |           |          |            |          |            |          |
| No                                        | 2.82      |          | 4.48       |          | 2.96       |          |
| Yes                                       | 3.52      | 0.6943   | 5.38       | 0.3969   | 5.26       | 0.0939   |
| <i>Single transverse palmar crease</i>    |           |          |            |          |            |          |
| No                                        | 2.28      |          | 4.51       |          | 2.98       |          |
| Yes                                       | 4.30      | 0.1810   | 5.69       | 0.2238   | 5.61       | 0.1810   |
| <i>Hallux separated</i>                   |           |          |            |          |            |          |
| No                                        | 1.81      |          | 4.19       |          | 3.43       |          |
| Yes                                       | 3.77      | 0.2799   | 5.47       | 0.1377   | 4.53       | 0.6608   |
| <i>Mental retardation</i>                 |           |          |            |          |            |          |
| No                                        | -         |          | -          |          | -          |          |
| Yes                                       | 3.05      | -        | 5.18       | -        | 4.36       | -        |
| <i>Celiac disease</i>                     |           |          |            |          |            |          |
| No                                        | 2.82      |          | 5.47       |          | 3.24       |          |
| Yes                                       | 3.52      | 0.9333   | 5.18       | 0.9333   | 5.26       | 0.4762   |
| <i>Masticatory disfunction</i>            |           |          |            |          |            |          |
| No                                        | 3.52      |          | 5.38       |          | 3.89       |          |
| Yes                                       | 3.55      | 0.6354   | 5.70       | 1.0000   | 5.11       | 0.7333   |
| <i>Constipation</i>                       |           |          |            |          |            |          |
| No                                        | 3.83      |          | 5.52       |          | 4.88       |          |
| Yes                                       | 2.28      | 0.1292   | 4.45       | 0.0753   | 2.59       | 0.1292   |
| <i>Diarrhea</i>                           |           |          |            |          |            |          |
| No                                        | 2.82      |          | 5.07       |          | 3.24       |          |
| Yes                                       | 5.18      | 0.2286   | 6.51       | 0.2286   | 5.63       | 0.3048   |

Table SII. Continued.

| DS pathologies                                           | miR-16-5p | P-values | miR-144-3p | P-values | miR-99b-5p | P-values |
|----------------------------------------------------------|-----------|----------|------------|----------|------------|----------|
| <i>Small genitalia</i>                                   |           |          |            |          |            |          |
| <i>No</i>                                                | 3.36      |          | 5.52       |          | 3.10       |          |
| <i>Yes</i>                                               | 4.60      | 0.7576   | 6.52       | 0.4848   | 5.59       | 0.3636   |
| <i>Number of comorbidities (categorical)<sup>a</sup></i> |           |          |            |          |            |          |
| <i>Low comorbidities</i>                                 | 4.00      |          | 5.58       |          | 4.79       |          |
| <i>Medium comorbidities</i>                              | 2.56      |          | 4.79       |          | 2.97       |          |
| <i>High comorbidities</i>                                | 4.82      | 0.4597   | 6.94       | 0.2051   | 6.04       | 0.05     |
| <i>Neurologic severity<sup>a</sup></i>                   |           |          |            |          |            |          |
| <i>Mild</i>                                              | 2.55      |          | 4.47       |          | 3.27       |          |
| <i>Moderate</i>                                          | 5.42      |          | 7.59       |          | 5.40       |          |
| <i>Severe</i>                                            | 2.56      | 0.5738   | 4.50       | 0.1178   | 3.60       | 0.5834   |

<sup>a</sup>Kruskal wallis test.

Table SIII. List of the miRNAs most abundant in the plasma secretome of DS (n=4) and C (n=4) subjects detected by at least 3 probes using agilent miRNA microarray.

| miRNA_name       | no. of probes | Chromosome |
|------------------|---------------|------------|
| hsa-miR-16-5p    | 5             | Chr3       |
| hsa-miR-5009-5p  | 5             | Chr15      |
| hsa-miR-99b-5p   | 4             | Chr19      |
| hsa-miR-4452     | 4             | Chr4       |
| hsa-miR-4775     | 4             | Chr2       |
| hsa-miR-548am-3p | 4             | ChrX       |
| hsa-miR-141-3p   | 3             | Chr12      |
| hsa-miR-302d-3p  | 3             | Chr4       |
| hsa-miR-3912-3p  | 3             | Chr5       |
| hsa-miR-3925-3p  | 3             | Chr6       |
| hsa-miR-4747-5p  | 3             | Chr19      |
| hsa-miR-548an    | 3             | ChrX       |
| hsa-miR-548aq-5p | 3             | Chr3       |
| hsa-miR-548b-5p  | 3             | Chr6       |
| hsa-miR-581      | 3             | Chr5       |

DS, Down syndrome subjects; C, healthy siblings; n, number; miR/miRNA, microRNA.

Table SIV. Descriptive statistics for quantitative variables available in the dataset.

| Descriptive | Mother's age    | Father's age    | Birth weight (g) | Development sitting months | Development babbling months | Development walking months | Development Sphincter control months |
|-------------|-----------------|-----------------|------------------|----------------------------|-----------------------------|----------------------------|--------------------------------------|
| Min         | 23.00           | 28.00           | 890.00           | 4.00                       | 7.00                        | 11.00                      | 30.00                                |
| Q1          | 32.00           | 32.50           | 2337.50          | 6.00                       | 13.50                       | 19.50                      | 30.00                                |
| Median      | 39.00           | 39.00           | 2890.00          | 7.50                       | 21.00                       | 24.00                      | 36.00                                |
| Mean        | 36.00           | 37.60           | 2748.47          | 8.25                       | 21.40                       | 28.21                      | 37.42                                |
| Std dev     | 5.52            | 5.60            | 960.67           | 3.13                       | 11.90                       | 13.08                      | 8.93                                 |
| Q3          | 40.00           | 41.50           | 3167.50          | 9.75                       | 24.00                       | 34.50                      | 37.50                                |
| Max         | 43.00           | 48.00           | 4210.00          | 15.00                      | 48.00                       | 60.00                      | 60.00                                |
| Missing (%) | 0.00<br>(0.00%) | 0.00<br>(0.00%) | 0.00<br>(0%)     | 1.00<br>(7.00%)            | 5.00<br>(33.00%)            | 1.00<br>(7.00%)            | 3.00<br>(20.00%)                     |

Table SV. Number of comorbidities for each DS subject and the corresponding categorical classification.

| ID   | Number of comorbidities for each DS subject | Number of comorbidities for each DS subject (categorical) |
|------|---------------------------------------------|-----------------------------------------------------------|
| DS01 | 17                                          | Low comorbidities                                         |
| DS02 | 21                                          | High comorbidities                                        |
| DS03 | 21                                          | High comorbidities                                        |
| DS04 | 20                                          | Medium comorbidities                                      |
| DS05 | 25                                          | High comorbidities                                        |
| DS06 | 19                                          | Medium comorbidities                                      |
| DS07 | 11                                          | Low comorbidities                                         |
| DS08 | 15                                          | Low comorbidities                                         |
| DS09 | 24                                          | High comorbidities                                        |
| DS10 | 22                                          | High comorbidities                                        |
| DS11 | 21                                          | High comorbidities                                        |
| DS12 | 21                                          | High comorbidities                                        |
| DS13 | 11                                          | Low comorbidities                                         |
| DS14 | 18                                          | Medium comorbidities                                      |
| DS15 | 18                                          | Medium comorbidities                                      |

DS, Down syndrome.

Table SVI. Descriptive statistics for miRs expression levels on all the subjects, DS subjects and C subjects respectively.

| Descriptive (all) | miR-16-5p | miR-144-3p | miR-99b-5p |
|-------------------|-----------|------------|------------|
| Min               | 0.00      | 0.00       | 0.00       |
| Q1                | 2.22      | 4.03       | 2.61       |
| Median            | 2.97      | 4.87       | 4.11       |
| Mean              | 3.22      | 5.01       | 3.96       |
| Std dev           | 1.76      | 1.76       | 1.91       |
| Q3                | 4.27      | 6.14       | 5.36       |
| Max               | 7.68      | 7.97       | 7.89       |
| Missing (%)       | 0.00 (0%) | 0.00 (0%)  | 0.00 (0%)  |

| Descriptive (DS) | miR-16-5p | miR-144-3p | miR-99b-5p |
|------------------|-----------|------------|------------|
| Min              | 0.34      | 0.00       | 0.00       |
| Q1               | 2.24      | 4.47       | 2.82       |
| Median           | 3.27      | 5.29       | 4.18       |
| Mean             | 3.56      | 5.18       | 4.18       |
| Std dev          | 1.96      | 1.94       | 2.05       |
| Q3               | 5.12      | 6.40       | 5.70       |
| Max              | 7.68      | 7.97       | 7.89       |
| Missing (%)      | 0.00 (0%) | 0.00 (0%)  | 0.00 (0%)  |

| Descriptive (C) | miR-16-5p | miR-144-3p | miR-99b-5p |
|-----------------|-----------|------------|------------|
| Min             | 0.00      | 1.88       | 1.11       |
| Q1              | 2.17      | 3.91       | 2.26       |
| Median          | 2.97      | 4.62       | 4.04       |
| Mean            | 2.88      | 4.84       | 3.74       |
| Std dev         | 1.51      | 1.61       | 1.80       |
| Q3              | 3.65      | 6.10       | 4.72       |
| Max             | 5.49      | 7.59       | 7.35       |
| Missing (%)     | 0.00 (0%) | 0.00 (0%)  | 0.00 (0%)  |

miR, microRNA.



Table SVII. Descriptive statistics (Mean, Median, Min-Max) on miRNA expression levels for the 2 clusters obtained on DS and C subjects with the Partitioning Around Medoids algorithm. The median expression levels of miRNAs are compared in the two clusters using the Wilcoxon signed-rank test.

|                                | Cluster 1 (C <sub>1</sub> ) | Cluster 2 (C <sub>2</sub> ) |
|--------------------------------|-----------------------------|-----------------------------|
| Number of healthy siblings (%) | 11 (55%)                    | 4 (40%)                     |
| Number of DS                   | 9 (45%)                     | 6 (60%)                     |
| miR-16-5p                      |                             |                             |
| Mean                           | 2.31                        | 5.04                        |
| Median                         | 2.33 <sup>a</sup>           | 5.33 <sup>a</sup>           |
| Min-Max                        | 0.00-3.89                   | 2.81-7.68                   |
| miR-144-3p                     |                             |                             |
| Mean                           | 4.19                        | 6.64                        |
| Median                         | 4.46 <sup>a</sup>           | 6.54 <sup>a</sup>           |
| Min-Max                        | 0.00-7.59                   | 5.29-7.97                   |
| miR-99b-5p                     |                             |                             |
| Mean                           | 2.97                        | 5.94                        |
| Median                         | 2.91 <sup>a</sup>           | 5.70 <sup>a</sup>           |
| Min-Max                        | 0.00-5.99                   | 4.47-7.89                   |

<sup>a</sup>P<0.05. miR/miRNA, microRNA DS, Down syndrome; C, control.

Table SVIII. Gene target prediction performed by miRWALK. The expression levels in peripheral blood leucocytes are also reported.

| A, miR-99b-5p |                             |                            |              |
|---------------|-----------------------------|----------------------------|--------------|
| Gene name     | Mean expression levels (DS) | Mean expression levels (C) | Ratio (DS/C) |
| FZD5          | 9,173197885                 | 8,48830639                 | 1,08         |
| LIF           | 13,43677518                 | 12,97990478                | 1,04         |
| PPM1H         | 7,377761361                 | 7,603011092                | 0,97         |

| B, miR-16-3p   |                             |                            |              |
|----------------|-----------------------------|----------------------------|--------------|
| Gene_name      | Mean expression levels (DS) | Mean expression levels (C) | Ratio (DS/C) |
| ADAMTS3        | 1,782850161                 | 1,852815197                | 0,96         |
| ASH1L          | 196,5940289                 | 197,8829887                | 0,99         |
| BCAS1          | 22,16839026                 | 23,72249889                | 0,93         |
| BCL2L2         | 339,9058115                 | 352,9397435                | 0,96         |
| BTG2           | 421,6781692                 | 437,9353887                | 0,96         |
| <b>C1orf21</b> | <b>45,29182185</b>          | <b>29,08559174</b>         | <b>1,56</b>  |
| CACUL1         | 47,94503021                 | 48,96900027                | 0,98         |
| CAPRIN1        | 117,749783                  | 122,4261628                | 0,96         |
| CAPZA2         | 289,8590265                 | 301,8449506                | 0,96         |
| CBX2           | 11,92518344                 | 11,57341461                | 1,03         |
| CBX4           | 507,511527                  | 496,6656402                | 1,02         |
| CC2D1B         | 34,95527472                 | 35,85438783                | 0,97         |
| CCDC6          | 160,1968777                 | 179,0429061                | 0,89         |
| CD2AP          | 70,50144413                 | 72,4134998                 | 0,97         |
| CLCN4          | 7,845742618                 | 8,356192267                | 0,94         |
| CNOT6L         | 215,9380156                 | 195,7648517                | 1,10         |
| DVL3           | 78,61796377                 | 72,05784327                | 1,09         |
| EZH1           | 96,15704691                 | 104,8020726                | 0,92         |
| FOXK1          | 50,19344801                 | 49,65154753                | 1,01         |
| FSTL4          | 8,734681479                 | 8,687189665                | 1,01         |
| GABARAPL1      | 68,14901818                 | 69,24004415                | 0,98         |
| GALNT1         | 187,7197903                 | 187,7780644                | 1,00         |
| IHH            | 16,0424799                  | 15,40365499                | 1,04         |
| IRAK2          | 25,2175894                  | 22,55530924                | 1,12         |
| KDSR           | 48,56795978                 | 52,78949262                | 0,92         |
| KIF5C          | 31,17863493                 | 30,85904598                | 1,01         |
| <b>KLHDC8B</b> | <b>32,89384806</b>          | <b>41,53126791</b>         | <b>0,79</b>  |
| LAMP3          | 19,27496358                 | 18,42682266                | 1,05         |
| LRP6           | 6,271889687                 | 7,831806432                | 0,80         |
| MASP1          | 11,51389032                 | 11,03790824                | 1,04         |
| MGAT4A         | 202,886157                  | 216,817676                 | 0,94         |
| MKNK1          | 164,3931261                 | 146,1047588                | 1,13         |
| MYO5A          | 64,76157863                 | 63,58263929                | 1,02         |
| N4BP1          | 168,5954089                 | 159,5117707                | 1,06         |
| <b>NEBL</b>    | <b>8,554425748</b>          | <b>6,849586804</b>         | <b>1,25</b>  |
| PAFAH1B1       | 180,0077546                 | 173,2690752                | 1,04         |
| PAPPA          | 5,40188175                  | 5,185052957                | 1,04         |
| PCMT1          | 384,9500502                 | 341,7391708                | 1,13         |
| <b>PDK4</b>    | <b>52,17409835</b>          | <b>36,89163843</b>         | <b>1,41</b>  |
| <b>PLAG1</b>   | <b>12,15647102</b>          | <b>22,42429832</b>         | <b>0,54</b>  |
| PLD1           | 11,59448225                 | 10,85816499                | 1,07         |
| POLR3F         | 36,79321461                 | 43,58865671                | 0,84         |
| PRDM4          | 103,5350442                 | 123,9595979                | 0,84         |
| PTCD3          | 133,6457611                 | 152,6841469                | 0,88         |

Table SVIII. Continued.

## B, miR-16-3p

| Gene_name       | Mean expression levels (DS) | Mean expression levels (C) | Ratio (DS/C) |
|-----------------|-----------------------------|----------------------------|--------------|
| PTH             | 1,819919797                 | 1,841387955                | 0,99         |
| RAB10           | 506,9463519                 | 505,9683616                | 1,00         |
| RAB3B           | 4,139648558                 | 4,147241963                | 1,00         |
| RAD23B          | 262,5231114                 | 264,6418531                | 0,99         |
| RET             | 17,5051355                  | 17,20688225                | 1,02         |
| RFK             | 93,48119538                 | 91,99537372                | 1,02         |
| RSBN1           | 145,8086464                 | 152,5156966                | 0,96         |
| <b>SESN1</b>    | <b>143,5623765</b>          | <b>241,4155565</b>         | <b>0,59</b>  |
| <b>SH3BGRL2</b> | <b>95,67576527</b>          | <b>59,89642176</b>         | <b>1,60</b>  |
| SLC12A2         | 29,25634817                 | 27,50275182                | 1,06         |
| SLC13A1         | 1,38446178                  | 1,509111322                | 0,92         |
| SLC1A2          | 8,794354023                 | 8,621352041                | 1,02         |
| SLC36A1         | 73,00016553                 | 67,08462681                | 1,09         |
| SNRNP48         | 51,34741198                 | 56,08864206                | 0,92         |
| <b>SNTB2</b>    | <b>33,93710607</b>          | <b>27,63397519</b>         | <b>1,23</b>  |
| SOCS6           | 5,049039313                 | 6,323563028                | 0,80         |
| SPRYD3          | 90,96905909                 | 86,58101599                | 1,05         |
| SSR1            | 421,1448657                 | 410,8232823                | 1,03         |
| ST8SIA3         | 2,46344795                  | 2,55129299                 | 0,97         |
| <b>SYNJ1</b>    | <b>49,20697838</b>          | <b>35,3854095</b>          | <b>1,39</b>  |
| TAF5            | 75,44284391                 | 81,64930231                | 0,92         |
| TFCP2L1         | 15,09125942                 | 14,13334953                | 1,07         |
| <b>TGFBR3</b>   | <b>550,3754615</b>          | <b>299,2779763</b>         | <b>1,84</b>  |
| TLK1            | 65,62923442                 | 72,88872716                | 0,90         |
| UBE2Q1          | 224,0609239                 | 204,6896099                | 1,09         |
| UBL3            | 357,1651822                 | 336,3211153                | 1,06         |
| UHMK1           | 336,655075                  | 309,6283507                | 1,09         |
| <b>USP25</b>    | <b>108,8311359</b>          | <b>77,23223383</b>         | <b>1,41</b>  |
| USP31           | 25,51497224                 | 22,3282164                 | 1,14         |
| VAPB            | 58,62849868                 | 61,52107276                | 0,95         |
| WEE1            | 41,98272252                 | 40,55873691                | 1,04         |
| YRDC            | 91,06081979                 | 75,91098232                | 1,20         |
| <b>YWHAH</b>    | <b>97,57898892</b>          | <b>68,7091271</b>          | <b>1,42</b>  |
| ZBTB39          | 39,4759048                  | 35,77985934                | 1,10         |
| SRPRA           | 254,3009577                 | 224,8940243                | 1,13         |
| SRPRB           | 103,2589731                 | 102,8773326                | 1,00         |

## C, miR-144-3p

| Gene name      | Mean expression levels (DS) | Mean expression levels (C) | Ratio (DS/C) |
|----------------|-----------------------------|----------------------------|--------------|
| <b>ABCA1</b>   | <b>23,86189104</b>          | <b>30,6549565</b>          | <b>0,78</b>  |
| ADAMTS17       | 9,521134419                 | 10,59436954                | 0,90         |
| ADAMTS3        | 1,782850161                 | 1,852815197                | 0,96         |
| AKAP11         | 171,9535236                 | 212,0830338                | 0,81         |
| ALDH1A3        | 3,75596824                  | 3,954423962                | 0,95         |
| APPBP2         | 74,17138991                 | 79,40961533                | 0,93         |
| ARID2          | 59,5088252                  | 61,04714088                | 0,97         |
| ARID5B         | 69,02871226                 | 76,87136891                | 0,90         |
| ARL4C          | 728,0116752                 | 653,7684964                | 1,11         |
| <b>ATXN1</b>   | <b>95,85845076</b>          | <b>69,12537451</b>         | <b>1,39</b>  |
| <b>BACH2</b>   | <b>66,93537687</b>          | <b>137,8033943</b>         | <b>0,49</b>  |
| <b>BHLHE41</b> | <b>5,916538162</b>          | <b>9,237500168</b>         | <b>0,64</b>  |

Table SVIII. Continued.

C, miR-144-3p

| Gene name      | Mean expression levels (DS) | Mean expression levels (C) | Ratio (DS/C) |
|----------------|-----------------------------|----------------------------|--------------|
| CAV2           | 6,143806975                 | 6,973521317                | 0,88         |
| CBX1           | 308,0881771                 | 306,9356208                | 1,00         |
| CD164          | 448,2738953                 | 425,8269899                | 1,05         |
| CD302          | 693,6094185                 | 844,2498899                | 0,82         |
| CDK19          | 70,05339798                 | 69,7857109                 | 1,00         |
| CDS2           | 122,0108531                 | 112,7052304                | 1,08         |
| CEP68          | 87,92652829                 | 96,87030287                | 0,91         |
| CLDN8          | 1,923050061                 | 2,062896416                | 0,93         |
| CMTM6          | 510,0593684                 | 492,9542653                | 1,03         |
| CREBRF         | 203,7306459                 | 235,7958278                | 0,86         |
| <b>CXCL11</b>  | <b>2,779043674</b>          | <b>2,042102555</b>         | <b>1,36</b>  |
| CXCL12         | 3,977441275                 | 3,593111088                | 1,11         |
| <b>DYRK1A</b>  | <b>151,826792</b>           | <b>116,6614094</b>         | <b>1,30</b>  |
| <b>E2F8</b>    | <b>4,863043521</b>          | <b>3,20264885</b>          | <b>1,52</b>  |
| ELL2           | 37,94895148                 | 31,68027394                | 1,20         |
| <b>FAM129A</b> | <b>372,2844779</b>          | <b>269,3409864</b>         | <b>1,38</b>  |
| <b>FAM8A1</b>  | <b>459,1912508</b>          | <b>374,292582</b>          | <b>1,23</b>  |
| FBN2           | 27,43902354                 | 28,42618555                | 0,97         |
| FGD6           | 9,776116922                 | 12,13264414                | 0,81         |
| FUBP3          | 32,86654368                 | 31,36416614                | 1,05         |
| <b>FZD6</b>    | <b>12,61466925</b>          | <b>18,90477613</b>         | <b>0,67</b>  |
| <b>GLCCI1</b>  | <b>125,3834064</b>          | <b>102,002244</b>          | <b>1,23</b>  |
| GNG12          | 5,648886688                 | 5,323344806                | 1,06         |
| HLTF           | 76,75121803                 | 86,63725327                | 0,89         |
| ITPRIPL2       | 44,0395844                  | 40,19383314                | 1,10         |
| KCND2          | 1,500324522                 | 1,448311181                | 1,04         |
| KCTD4          | 3,287080007                 | 3,22704846                 | 1,02         |
| KIAA1024       | 3,032169748                 | 3,449052459                | 0,88         |
| KIAA1549L      | 3,49427052                  | 3,48883542                 | 1,00         |
| KIDINS220      | 130,4666146                 | 123,7841143                | 1,05         |
| <b>KIF14</b>   | <b>6,090425934</b>          | <b>4,56529141</b>          | <b>1,33</b>  |
| KIF3A          | 39,93045014                 | 38,02131639                | 1,05         |
| KL             | 2,1104397                   | 2,173141498                | 0,97         |
| KLB            | 2,07231836                  | 2,136753895                | 0,97         |
| LARP4B         | 57,45296314                 | 52,44383058                | 1,10         |
| LCOR           | 83,30271888                 | 79,64524245                | 1,05         |
| LRAT           | 2,185275748                 | 2,067049478                | 1,06         |
| MAOB           | 4,382510941                 | 4,373338362                | 1,00         |
| MAP7D1         | 384,6691244                 | 382,1154812                | 1,01         |
| MED12L         | 3,636952782                 | 3,709083367                | 0,98         |
| MED4           | 70,2571741                  | 63,87881158                | 1,10         |
| MEGF9          | 248,383716                  | 251,5814097                | 0,99         |
| <b>MFSD6</b>   | <b>90,90805397</b>          | <b>65,65282736</b>         | <b>1,38</b>  |
| MGAT4A         | 202,886157                  | 216,817676                 | 0,94         |
| MMGT1          | 408,0546838                 | 423,5408534                | 0,96         |
| MTMR9          | 96,95350843                 | 100,075505                 | 0,97         |
| MYBL1          | 201,035806                  | 167,7833111                | 1,20         |
| MYO1E          | 27,61494126                 | 29,26353567                | 0,94         |
| NDFIP1         | 335,2224791                 | 371,5697673                | 0,90         |
| NECAB1         | 1,452384756                 | 1,560596054                | 0,93         |
| NETO2          | 36,19279911                 | 39,32735728                | 0,92         |
| NLN            | 38,8209324                  | 39,164244                  | 0,99         |
| <b>NPTX1</b>   | <b>26,31839153</b>          | <b>16,47824418</b>         | <b>1,60</b>  |
| NR2F2          | 3,596957472                 | 3,580073963                | 1,00         |

Table SVIII. Continued.

C, miR-144-3p

| Gene name       | Mean expression levels (DS) | Mean expression levels (C) | Ratio (DS/C) |
|-----------------|-----------------------------|----------------------------|--------------|
| NT5DC1          | 72,42333682                 | 86,28621924                | 0,84         |
| ONECUT2         | 3,659340668                 | 3,592315636                | 1,02         |
| PCDH20          | 1,710970283                 | 1,639595221                | 1,04         |
| PGRMC2          | 82,82650778                 | 84,15708427                | 0,98         |
| PPAT            | 25,54669911                 | 30,1800601                 | 0,85         |
| <b>PPP1R16B</b> | <b>143,1408736</b>          | <b>115,1406195</b>         | <b>1,24</b>  |
| PTPN9           | 26,33804968                 | 25,5411439                 | 1,03         |
| QSER1           | 43,2513939                  | 46,92395141                | 0,92         |
| RAP2B           | 211,2917272                 | 186,0963934                | 1,14         |
| RASSF3          | 324,5019185                 | 339,9002132                | 0,95         |
| RAVER2          | 5,595842349                 | 5,829916357                | 0,96         |
| RET             | 17,5051355                  | 17,20688225                | 1,02         |
| <b>RGL1</b>     | <b>73,42317846</b>          | <b>60,2050597</b>          | <b>1,22</b>  |
| RNF125          | 221,8709583                 | 207,9480939                | 1,07         |
| SFRP1           | 11,21563825                 | 12,21509191                | 0,92         |
| SIM1            | 2,082095561                 | 2,10342395                 | 0,99         |
| SLC26A2         | 88,78603185                 | 90,78371583                | 0,98         |
| SLC35A3         | 71,00908775                 | 76,30730435                | 0,93         |
| SLC7A11         | 6,621803716                 | 6,474624719                | 1,02         |
| SMARCA1         | 1,880926338                 | 2,208738963                | 0,85         |
| <b>SNTB2</b>    | <b>33,93710607</b>          | <b>27,63397519</b>         | <b>1,23</b>  |
| SOCS6           | 5,049039313                 | 6,323563028                | 0,80         |
| SPOPL           | 199,9317545                 | 228,6225391                | 0,87         |
| SRPK1           | 131,8592621                 | 111,1707713                | 1,19         |
| SUCLG2          | 127,5399445                 | 145,5486043                | 0,88         |
| <b>SYT11</b>    | <b>66,95651366</b>          | <b>41,51716371</b>         | <b>1,61</b>  |
| TEK             | 3,125133653                 | 3,086186623                | 1,01         |
| TMF1            | 81,09052196                 | 85,47054288                | 0,95         |
| <b>TMTC3</b>    | <b>14,80881552</b>          | <b>18,80456389</b>         | <b>0,79</b>  |
| TNKS2           | 114,4241168                 | 117,4638287                | 0,97         |
| <b>TNS3</b>     | <b>89,7844367</b>           | <b>115,9790452</b>         | <b>0,77</b>  |
| TSPAN12         | 9,696989542                 | 9,467224387                | 1,02         |
| TUBGCP5         | 11,64829296                 | 13,62564333                | 0,85         |
| UBE2G1          | 259,6751565                 | 248,4071896                | 1,05         |
| <b>VANGL1</b>   | <b>21,66765989</b>          | <b>16,92019378</b>         | <b>1,28</b>  |
| VPS4B           | 350,8871775                 | 358,8912523                | 0,98         |
| YWHAG           | 605,7599584                 | 654,3746459                | 0,93         |
| ZC3H6           | 38,41863303                 | 43,62212345                | 0,88         |
| ZNF148          | 93,32898369                 | 105,9362651                | 0,88         |
| <b>ZNF260</b>   | <b>26,68225303</b>          | <b>38,49095501</b>         | <b>0,69</b>  |

Bold, differentially expressed genes between DS and C participants.
